# Supplementary material for: From lignocellulosic biomass to renewable cycloalkanes for jet fuels
Source: Royal Society of Chemistry journal article supplement (doi:10.1039/c5gc01583a), 2015-01-01
Supplement: c5gc01583a1.pdf [file c5gc01583a1.pdf]

Supplementary information:

**Table S1** Proximate and elemental analyses of Douglas fir sawdust pellets

| Characteristics                 | Douglas fir sawdust pellets |
|---------------------------------|-----------------------------|
| <i>Proximate analysis (wt%)</i> |                             |
| Moisture                        | 4.82                        |
| Volatile matter                 | 76.08                       |
| Fixed carbon                    | 18.89                       |
| Ash                             | 0.21                        |
| <i>Elemental analysis (wt%)</i> |                             |
| Carbon                          | 47.90                       |
| Hydrogen                        | 6.55                        |
| Nitrogen                        | 0.08                        |
| Oxygen                          | 45.57                       |

**Table S2** Proximate and elemental analyses of char

| Characteristics                 | Char  |
|---------------------------------|-------|
| <i>Proximate analysis (wt%)</i> |       |
| Moisture                        | 6.63  |
| Ash                             | 11.86 |
| <i>Elemental analysis (wt%)</i> |       |
| Carbon                          | 81.47 |
| Hydrogen                        | 0.72  |
| Nitrogen                        | 0.69  |
| Oxygen                          | 4.38  |

**Table S3** CHN and TOC analysis of mixed bio-oils from catalytic microwave pyrolysis

| Characteristics | Mixed bio-oils |
|-----------------|----------------|
| Carbon          | 78.60          |
| Hydrogen        | 8.72           |
| Nitrogen        | 0.02           |
| Oxygen          | 6.22           |

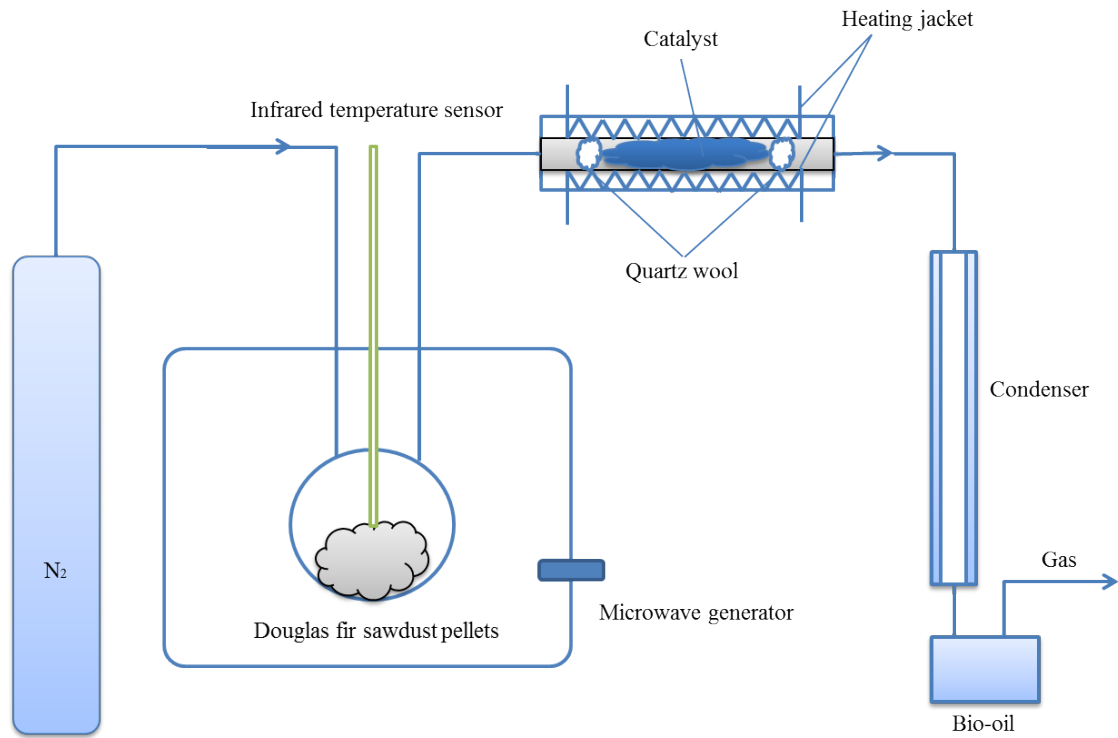

**Fig. S1** The schematic diagram of the microwave-assisted pyrolysis system integrated with catalysis process

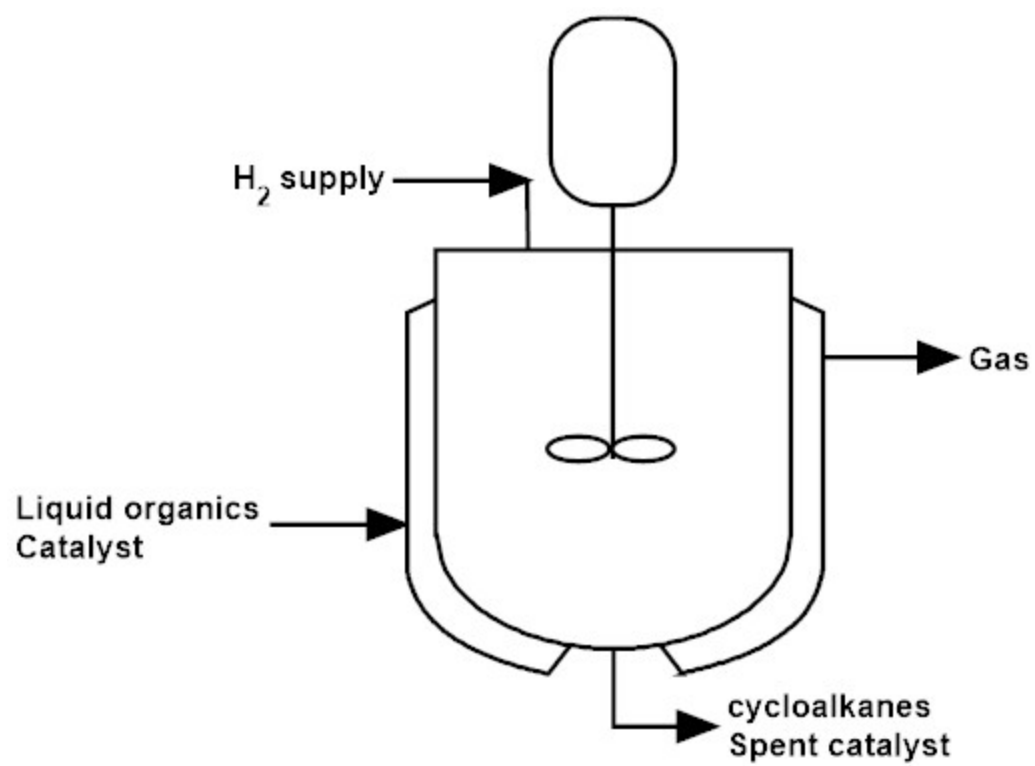

**Fig. S2** The schematic overview of the hydrogenation process set-up
